# Supplementary material for: A service-oriented architecture for integrating the modeling and formal verification of genetic regulatory networks
Source: Springer Nature journal article supplement (doi:10.1186/1471-2105-10-450), 2009-12-01

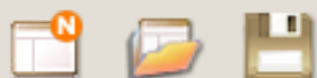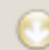

Model (transreg56\_7\_0)

- Variables
  - Crp
  - Cya
  - Fis
  - GyrAB
  - GyrI
  - RpoS
  - RssB
  - Signal
  - TopA
  - rrn
- Initial conditions
  - exp\_to\_stat
  - stat\_to\_exp
- Atomic propositions
  - inc\_rrn
  - dec\_rrn
  - high\_RpoS
  - low\_rrn
- Properties
  - Prop\_HighRpoS\_lowrrn

Influence graph

Atomic proposition high\_RpoS

Property Prop\_HighRpoS\_lowrrn

Patterns

Expert

Occurrence

 It is possible for a state true to occur

Consequence

 If a state true occurs, then it is possibly followed by a state true

Sequence

 A state low\_rrn is reachable and is necessarily preceded at some time by a state high\_RpoS

 at some time  
 all the time

Invariance

 A state true can persist indefinitely

Use selected Pattern

Clear

 Check syntax

 $EF ( low\_rrn ) \text{ and not } E [ \text{not } high\_RpoS \cup low\_rrn ]$ 

Specify verification...

GyrAB

Fis

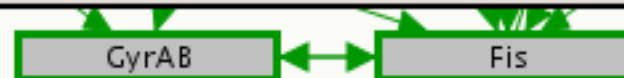

Supplement: 12859_2009_3180_MOESM6_ESM.pdf [file 12859_2009_3180_MOESM6_ESM.pdf]
