# Supplementary material for: A service-oriented architecture for integrating the modeling and formal verification of genetic regulatory networks
Source: Springer Nature journal article supplement (doi:10.1186/1471-2105-10-450), 2009-12-01

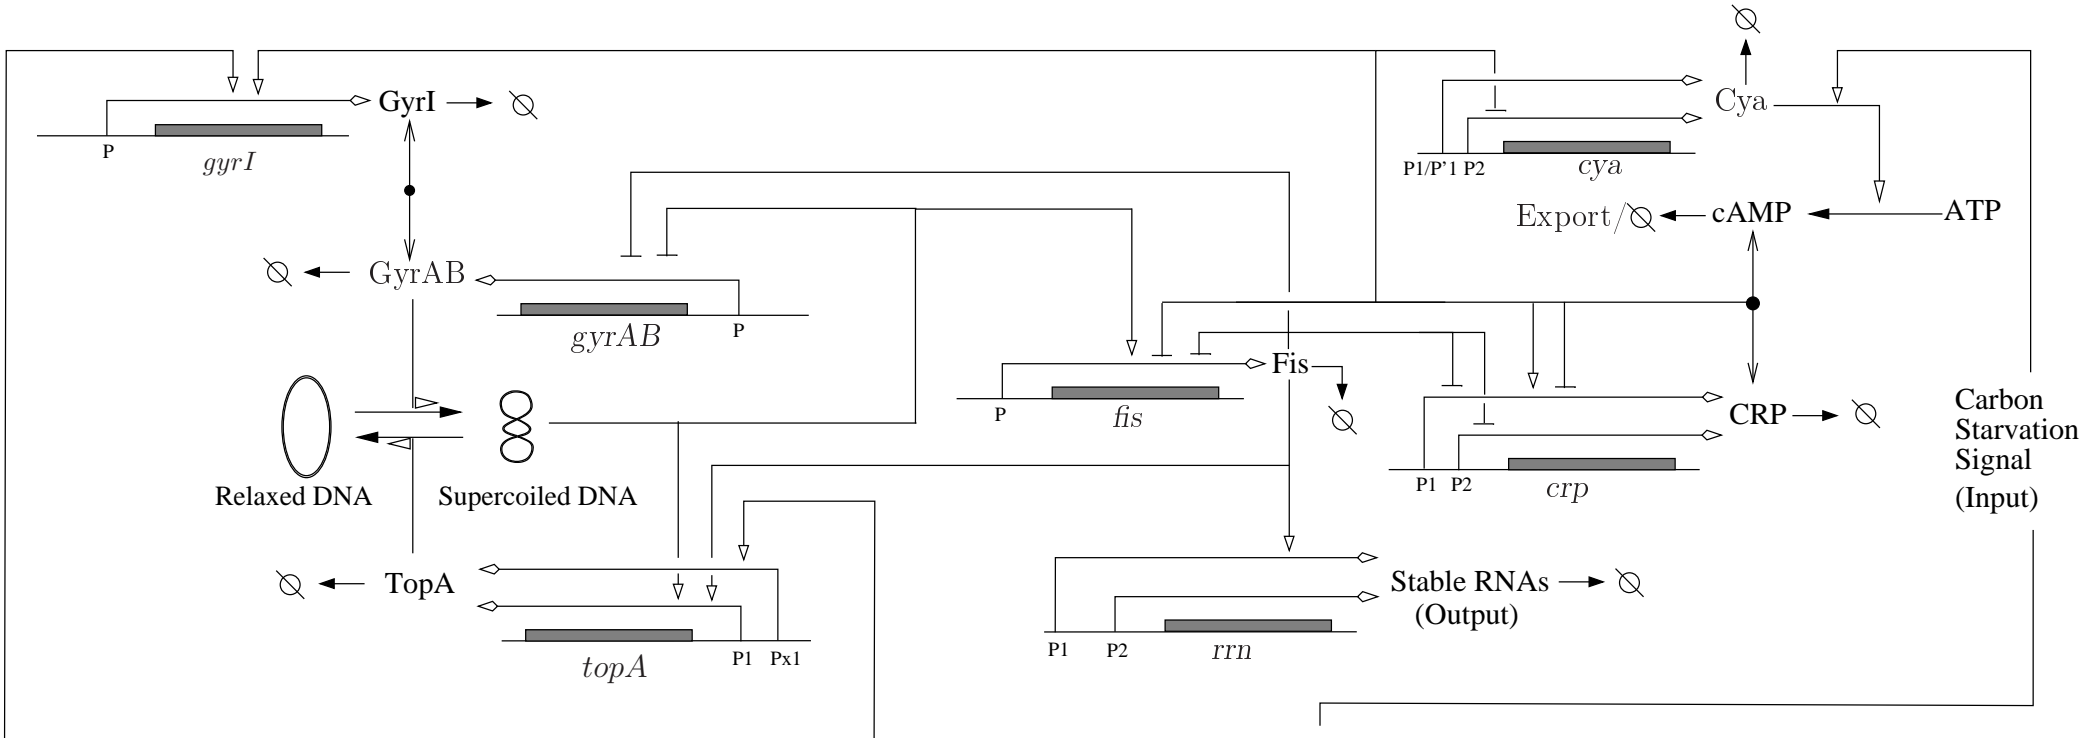

**Legend**

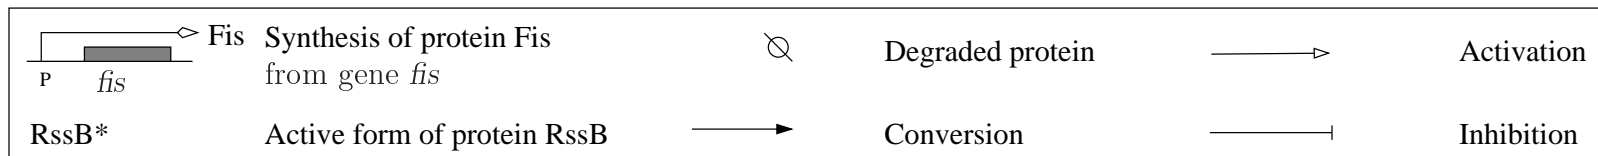

Supplement: 12859_2009_3180_MOESM7_ESM.pdf [file 12859_2009_3180_MOESM7_ESM.pdf]
