# Supplementary material for: A service-oriented architecture for integrating the modeling and formal verification of genetic regulatory networks
Source: Springer Nature journal article supplement (doi:10.1186/1471-2105-10-450), 2009-12-01

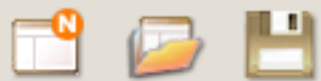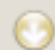

Model (transreg56\_7\_0)

- Variables
  - Crp
  - Cya
  - Fis
  - GyrAB
  - Gyrl
  - RpoS
  - RssB
  - Signal
  - TopA
  - rrn
- Initial conditions
  - exp\_to\_stat
  - stat\_to\_exp
- Atomic propositions
  - inc\_rrn
  - dec\_rrn
  - high\_RpoS
  - low\_rrn
- Properties
  - Prop\_HighRpoS\_lowrrn

Verification of property Prop\_HighRpo...

Options Results

Property is: **FALSE**

Help

Counterexample transition graph

Graph1

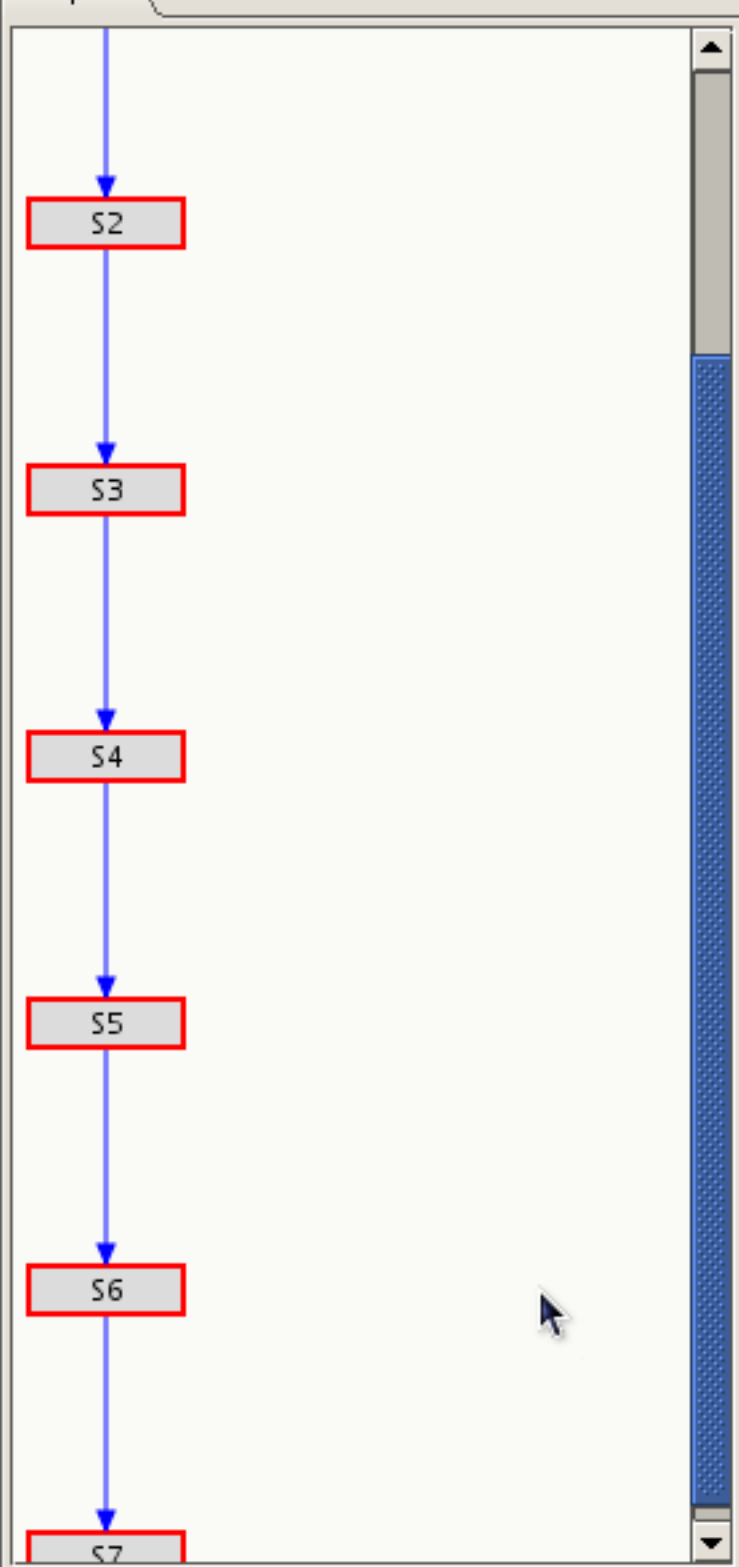

State variables in path of selected states Graph1

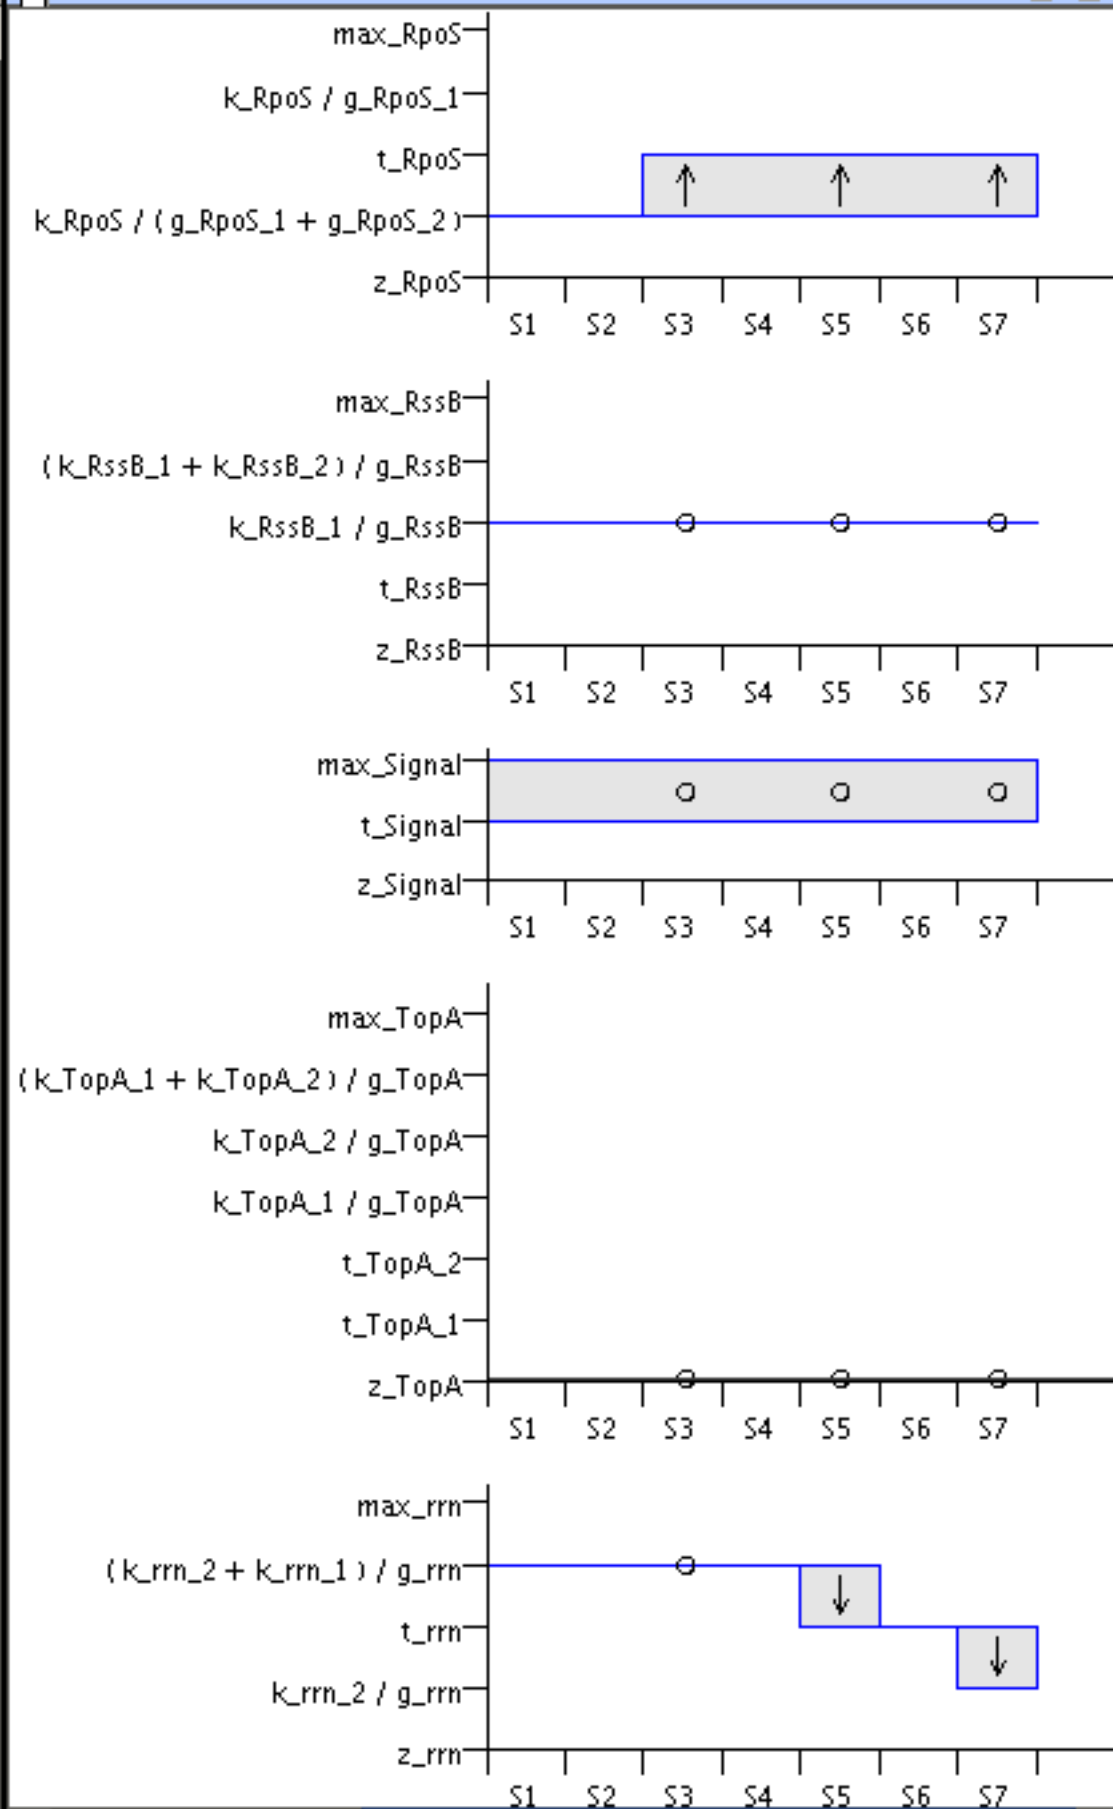

Supplement: 12859_2009_3180_MOESM8_ESM.pdf [file 12859_2009_3180_MOESM8_ESM.pdf]
